# Supplementary material
Source: PubMed Central journal article supplement (PMC7533985)
Supplement: 41390_2020_1159_MOESM1_ESM.pdf [file 41390_2020_1159_MOESM1_ESM.pdf]

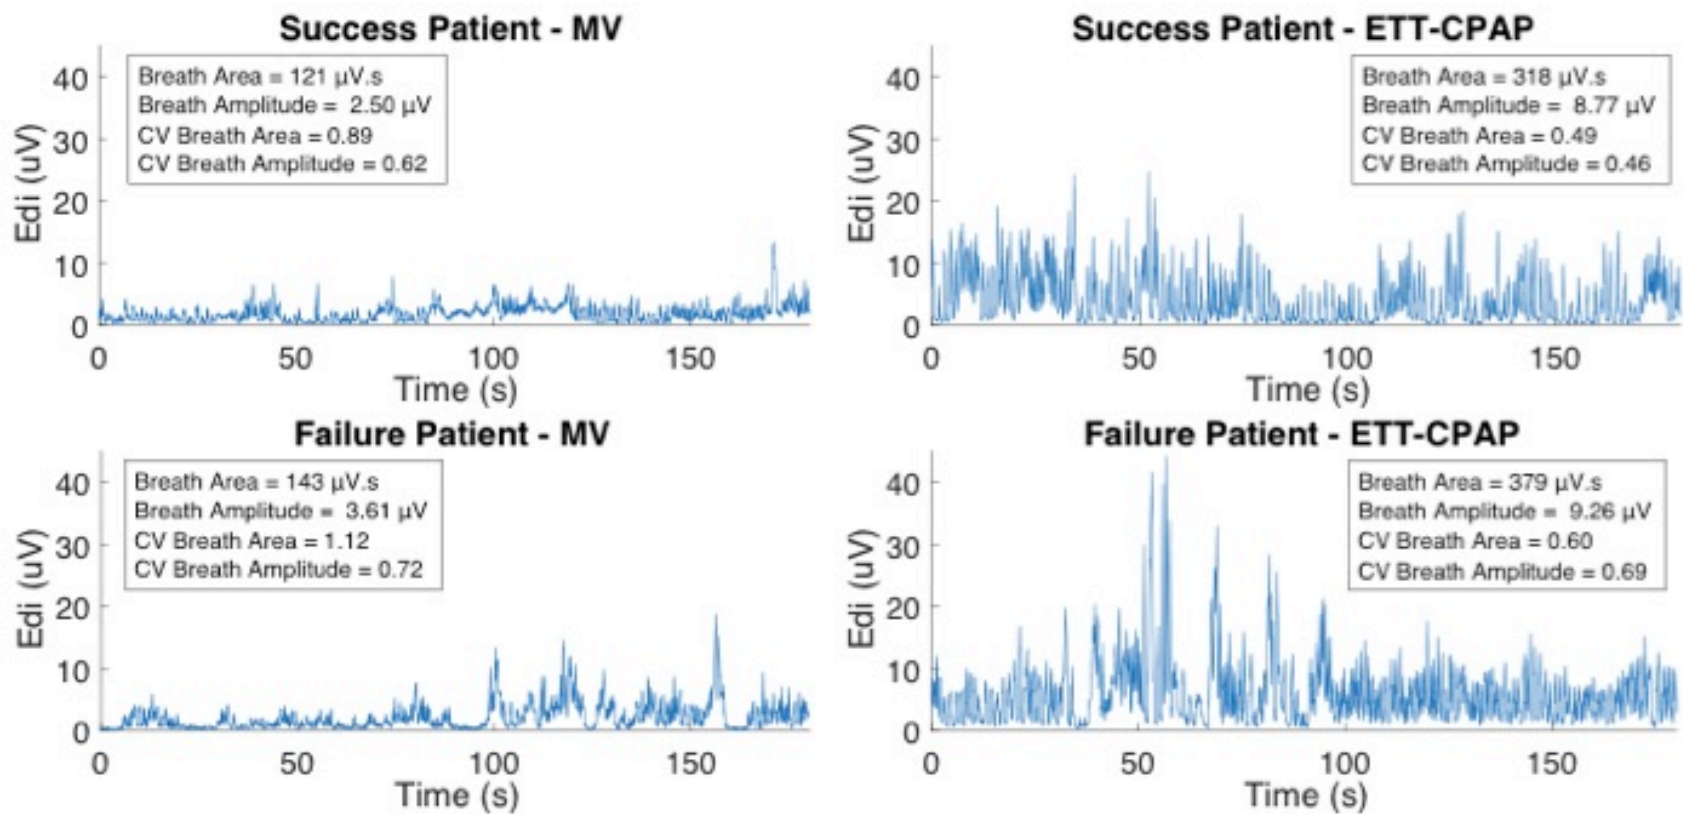

**Supplemental Figure S1.** Sample signals from a successful and failed extubation during mechanical ventilation weaning.

**Legend:** Ed<sub>i</sub> = electrical activity of the diaphragm, MV = mechanical ventilation, ETT-CPAP = endotracheal tube continuous positive airway pressure, CV = coefficient of variation.

**Supplemental Table S1.** Patient demographics.

| Patients                        | Success |      |      |      |      |      |      | Failure |      |      |      |      |      |
|---------------------------------|---------|------|------|------|------|------|------|---------|------|------|------|------|------|
|                                 | 1       | 2    | 3    | 5    | 8    | 9    | 13   | 4       | 6    | 7    | 10   | 11   | 12   |
| <b>Demographics</b>             |         |      |      |      |      |      |      |         |      |      |      |      |      |
| Birth weight (g)                | 830     | 965  | 620  | 920  | 1240 | 1020 | 890  | 550     | 800  | 620  | 600  | 600  | 610  |
| Gestational age (wk)            | 26.3    | 29.1 | 25.3 | 25.7 | 28.0 | 27.9 | 24.4 | 23.1    | 25.7 | 24.9 | 24.1 | 25.4 | 23.6 |
| Weight at extubation (g)        | 760     | 990  | 650  | 850  | 1240 | 1080 | 1140 | 720     | 775  | 780  | 950  | 910  | 870  |
| PCA at extubation (wk)          | 27.1    | 29.6 | 26.3 | 25.9 | 28.1 | 28.7 | 29.6 | 27.1    | 26.0 | 27.4 | 27.6 | 29.3 | 26.6 |
| DOL at extubation (days)        | 7       | 4    | 8    | 2    | 1    | 7    | 37   | 29      | 3    | 19   | 25   | 28   | 22   |
| Sex                             | M       | M    | F    | M    | M    | M    | M    | F       | F    | M    | F    | M    | M    |
| <b>Pre-extubation blood gas</b> |         |      |      |      |      |      |      |         |      |      |      |      |      |
| pH                              | 7.25    | 7.23 | 7.35 | 7.28 | 7.34 | 7.34 | 7.41 | 7.3     | 7.35 | 7.39 | 7.4  | 7.37 | 7.39 |
| PCO <sub>2</sub> (mmHg)         | 55      | 56   | 35   | 39   | 38   | 47   | 47   | 57      | 37   | 41   | 43   | 53   | 48   |
| Base Excess (mmol/L)            | -3      | -3.9 | -5.8 | -7.6 | -4.5 | -0.8 | 4.8  | 1.9     | -4.4 | -0.1 | 1.9  | 4.8  | 3.9  |
| Total hemoglobin (g/L)          | 139     | 159  | 116  | 122  | 168  | 141  | 101  | 133     | 139  | 150  | 95   | 112  | 125  |
| <b>Pre-extubation settings</b>  |         |      |      |      |      |      |      |         |      |      |      |      |      |
| Endotracheal tube size (mm)     | 2.5     | 3.0  | 2.5  | 2.5  | 3.0  | 2.5  | 2.5  | 2.5     | 2.5  | 2.5  | 2.5  | 2.5  | 2.5  |
| <i>Mechanical Ventilation</i>   |         |      |      |      |      |      |      |         |      |      |      |      |      |
| PEEP (cmH <sub>2</sub> O)       | 6       | 5    | 6    | 5    | 5    | 5    | 8    | 5       | 5    | 6    | 6    | 5    | 5    |
| MAP (cmH <sub>2</sub> O)        | 6.9     | 6    | 7.9  | 8    | 5.3  | 7.2  | 9    | 5.4     | 7.3  | 7.8  | 6.2  | 6.4  | 7.9  |
| Maximum FiO <sub>2</sub>        | 0.25    | 0.21 | 0.24 | 0.21 | 0.21 | 0.25 | 0.38 | 0.45    | 0.21 | 0.25 | 0.31 | 0.29 | 0.26 |
| Tidal volume (ml/kg)            | 5.5     | 4.8  | -    | 5.3  | 4    | -    | 4.8  | 4.2     | -    | 4.9  | 4.5  | 4.6  | 4.7  |
| Rate                            | 45      | 20   | -    | 40   | 20   | -    | 20   | 20      | -    | 20   | 20   | 10   | 20   |
| <i>ETT-CPAP</i>                 |         |      |      |      |      |      |      |         |      |      |      |      |      |
| PEEP (cmH <sub>2</sub> O)       | 6       | 5    | 6    | 5    | 5    | 5    | 8    | 5       | 5    | 6    | 6    | 5    | 5    |
| Maximum FiO <sub>2</sub>        | 0.25    | 0.21 | 0.24 | 0.24 | 0.21 | 0.3  | 0.38 | 0.4     | 0.3  | 0.25 | 0.31 | 0.42 | 0.32 |
| <b>Extubation failure</b>       |         |      |      |      |      |      |      |         |      |      |      |      |      |
| Time to reintubation (h)        | -       | -    | -    | -    | -    | -    | -    | 16      | 100  | 82   | 1    | 13   | 0.5  |
| Reason for reintubation         | -       | -    | -    | -    | -    | -    | -    | A&B     | A&B  | RA   | A&B  | A&B  | A&B  |

Legend: PCA = post-conceptual age, DOL = day of life,  $\text{PCO}_2$  = partial pressure of carbon dioxide, PEEP = positive end-expiratory pressure, MAP = mean airway pressure,  $\text{FiO}_2$  = fraction of inspired oxygen, A&B = apneas and bradycardias, RA = respiratory acidosis. All patients were on assisted control mode before extubation.

**Supplemental Table S2.** Respiratory variability during mechanical ventilation weaning.

|                                                 | MV                 | ETT-CPAP            | $\Delta_{ETT-CPAP - MV}$ | <i>p</i> -value |
|-------------------------------------------------|--------------------|---------------------|--------------------------|-----------------|
| <b>BB Intervals (s)</b>                         |                    |                     |                          |                 |
| SD <sub>BB</sub>                                | 0.56 [0.32 - 0.90] | 0.40 [0.36 - 0.46]  | -0.14 [-0.39 - 0.05]     | 0.305           |
| CV <sub>BB</sub>                                | 0.48 [0.36 - 0.68] | 0.37 [0.33 - 0.46]  | -0.11 [-0.20 - 0.02]     | 0.127           |
| SDSD <sub>BB</sub>                              | 0.76 [0.40 - 1.01] | 0.48 [0.40 - 0.58]  | -0.12 [-0.43 - 0.07]     | 0.340           |
| TI <sub>BB</sub>                                | 3.19 [2.46 - 4.00] | 3.05 [2.52 - 3.58]  | 0.05 [-0.42 - 0.57]      | 1.000           |
| <b>Breath Area (<math>\mu V \cdot s</math>)</b> |                    |                     |                          |                 |
| SD <sub>Area</sub>                              | 312 [209 - 415]    | 326 [230 - 458]     | 48 [22 - 127]            | 0.040           |
| CV <sub>Area</sub>                              | 0.84 [0.67 - 0.91] | 0.62 [0.58 - 0.86]  | -0.09 [-0.27 - 0.06]     | 0.141           |
| SDSD <sub>Area</sub>                            | 402 [221 - 468]    | 424 [287 - 549]     | 58 [37 - 136]            | 0.021           |
| TI <sub>Area</sub>                              | 4.08 [3.39 - 5.49] | 5.00 [3.58 - 7.38]  | 1.38 [0.57 - 2.49]       | 0.033           |
| <b>Neural Ti (s)</b>                            |                    |                     |                          |                 |
| SD <sub>NTi</sub>                               | 0.34 [0.20 - 0.61] | 0.21 [0.19 - 0.29]  | -0.09 [-0.16 - 0.01]     | 0.094           |
| CV <sub>NTi</sub>                               | 0.74 [0.52 - 0.87] | 0.48 [0.42 - 0.55]  | -0.18 [-0.32 - 0.00]     | 0.046           |
| SDSD <sub>NTi</sub>                             | 0.46 [0.26 - 0.73] | 0.27 [0.23 - 0.39]  | -0.10 [-0.27 - -0.01]    | 0.080           |
| TI <sub>NTi</sub>                               | 3.12 [2.43 - 3.90] | 3.25 [2.58 - 3.67]  | 0.61 [-0.48 - 0.90]      | 0.455           |
| <b>Neural Te (s)</b>                            |                    |                     |                          |                 |
| SD <sub>NTe</sub>                               | 0.44 [0.23 - 0.55] | 0.27 [0.26 - 0.32]  | -0.04 [-0.22 - 0.04]     | 0.497           |
| CV <sub>NTe</sub>                               | 0.60 [0.46 - 0.76] | 0.46 [0.39 - 0.55]  | -0.06 [-0.21 - 0.09]     | 0.530           |
| SDSD <sub>NTe</sub>                             | 0.55 [0.30 - 0.63] | 0.33 [0.31 - 0.39]  | -0.02 [-0.30 - 0.06]     | 0.542           |
| TI <sub>NTe</sub>                               | 4.79 [3.33 - 5.50] | 3.57 [3.44 - 4.67]  | -0.29 [-0.89 - 0.30]     | 0.588           |
| <b>Breath amplitude (<math>\mu V</math>)</b>    |                    |                     |                          |                 |
| SD <sub>Amp</sub>                               | 6.29 [4.83 - 7.83] | 7.15 [4.97 - 9.17]  | 1.47 [0.13 - 2.49]       | 0.110           |
| CV <sub>Amp</sub>                               | 0.64 [0.58 - 0.72] | 0.54 [0.49 - 0.69]  | -0.05 [-0.15 - 0.04]     | 0.077           |
| SDSD <sub>Amp</sub>                             | 7.57 [5.52 - 9.43] | 9.50 [6.45 - 10.74] | 2.35 [0.67 - 3.31]       | 0.013           |
| TI <sub>Amp</sub>                               | 2.55 [2.02 - 3.32] | 2.48 [1.99 - 3.44]  | 0.45 [-0.39 - 0.83]      | 0.305           |
| <b>Breath Width (s)</b>                         |                    |                     |                          |                 |
| SD <sub>Width</sub>                             | 0.15 [0.12 - 0.23] | 0.11 [0.11 - 0.15]  | -0.02 [-0.11 - -0.01]    | 0.033           |
| CV <sub>Width</sub>                             | 0.37 [0.32 - 0.50] | 0.34 [0.28 - 0.37]  | -0.04 [-0.21 - -0.03]    | 0.046           |
| SDSD <sub>Width</sub>                           | 0.19 [0.15 - 0.31] | 0.16 [0.14 - 0.21]  | -0.04 [-0.17 - 0.01]     | 0.040           |
| TI <sub>Width</sub>                             | 2.69 [2.47 - 2.82] | 2.44 [2.27 - 3.11]  | -0.12 [-0.28 - 0.33]     | 1.000           |

**Legend:** MV = mechanical ventilation, ETT-CPAP = endotracheal tube continuous positive airway pressure,  $\Delta_{ETT-CPAP - MV}$  = difference between ETT-CPAP and MV, BB = breath-to-breath, SD = standard deviation, CV = coefficient of variation; SDSD = standard deviation of successive differences, TI = triangular index, NTi = neural inspiratory time, Ti = inspiratory time, Te = expiratory time. Values are presented as median [IQR].

**Supplemental Table S3.** Receiver-operator characteristics (ROC) for select variability measures for the identification of successfully extubated infants.

| Variability Parameter  | MV                 |               |       |       | ETT-CPAP           |               |       |       |
|------------------------|--------------------|---------------|-------|-------|--------------------|---------------|-------|-------|
|                        | AUC <sub>ROC</sub> | Cut-off value | Sens. | Spec. | AUC <sub>ROC</sub> | Cut-off value | Sens. | Spec. |
| SDSD <sub>BB</sub> (s) | 0.91               | <0.89         | 100%  | 83.3% | 0.98               | <0.48         | 85.7% | 100%  |
| CV <sub>NTi</sub>      | 0.91               | <0.81         | 100%  | 83.3% | 1.00               | <0.50         | 100%  | 100%  |
| CV <sub>Amp</sub>      | 1.00               | <0.66         | 100%  | 100%  | 0.93               | <0.56         | 85.7% | 83.3% |

**Legend:** MV = mechanical ventilation, ETT-CPAP = endotracheal tube continuous positive airway pressure, SDSD<sub>BB</sub> = standard deviation of successive differences of breath-to-breath intervals, CV<sub>NTi</sub> = coefficient of variation of the neural inspiratory time, CV<sub>Amp</sub> = coefficient of variation of breath amplitude, AUC<sub>ROC</sub> = area under the receiver operator characteristic curve, Sens. = sensitivity, Spec. = specificity.
